# Supplementary material for: Interfacial self-assembly of a rigid-flexible terpyridine-Fe( ii ) supramolecular film and the electrochromic performance of its solid-state devices
Source: Royal Society of Chemistry journal article supplement (doi:10.1039/d4tc03235g), 2024-01-01
Supplement: d4tc03235g1.pdf [file d4tc03235g1.pdf]

## Supporting information

### **Interfacial self-assembly of a rigid-flexible terpyridine-Fe(II) supramolecular film and the electrochromic performance of its solid-state devices**

Xiaomeng Sun, Xinfeng Cheng,\* Xiya Chen, Hongwei Wang, Qian Zhao, Chunxia Yang, Xianchao Du, Xiaojing Xing, and Dongfang Qiu\*

*College of Chemistry and Pharmaceutical Engineering, Nanyang Normal University, Nanyang 473061, China*

\* Correspondence: x.f.cheng@nynu.edu.cn (X.C.); qiudf2008@nynu.edu.cn (D.Q.)

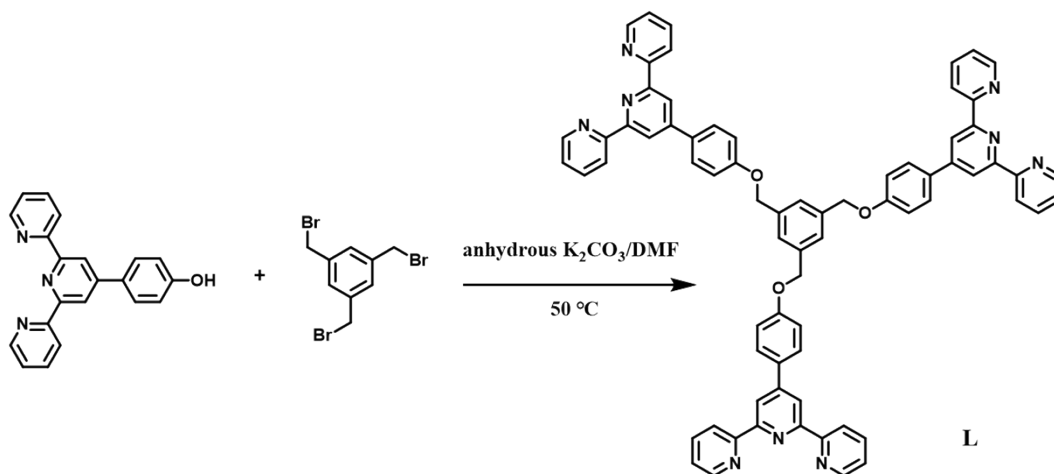

**Scheme S1.** Synthetic process of the target ligand **L**

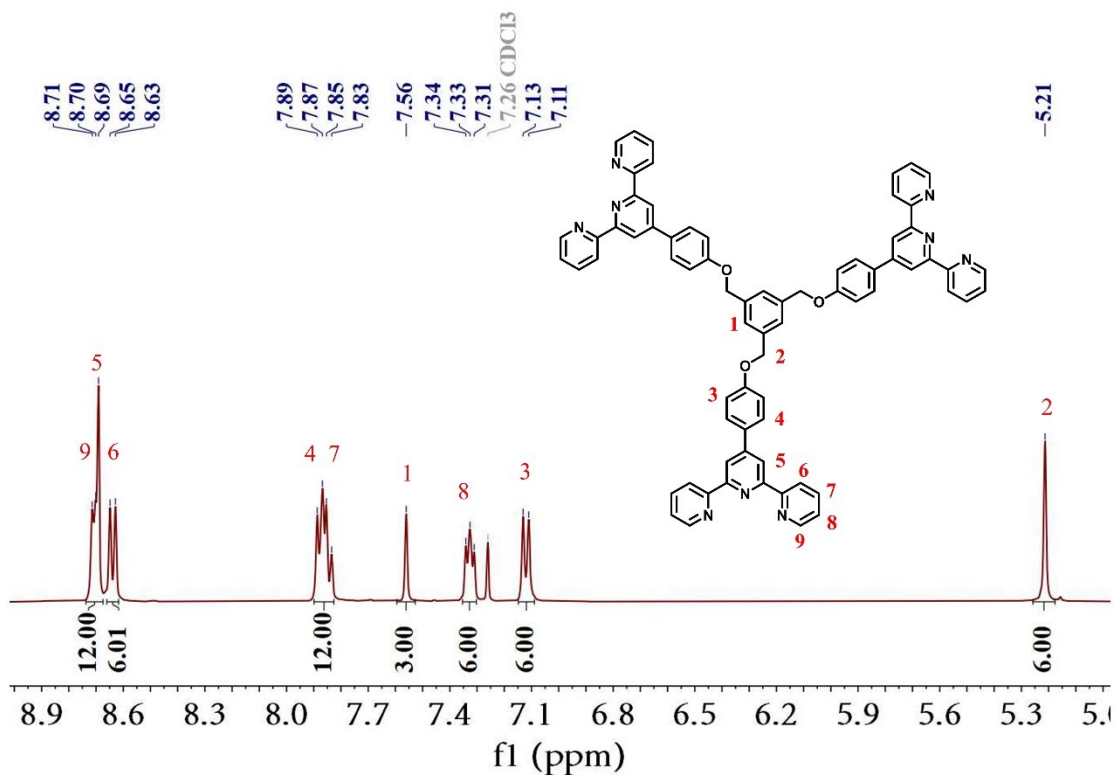

**Figure S1.**  $^1\text{H}$  NMR spectrum of **L** (400 MHz,  $CDCl_3$ )

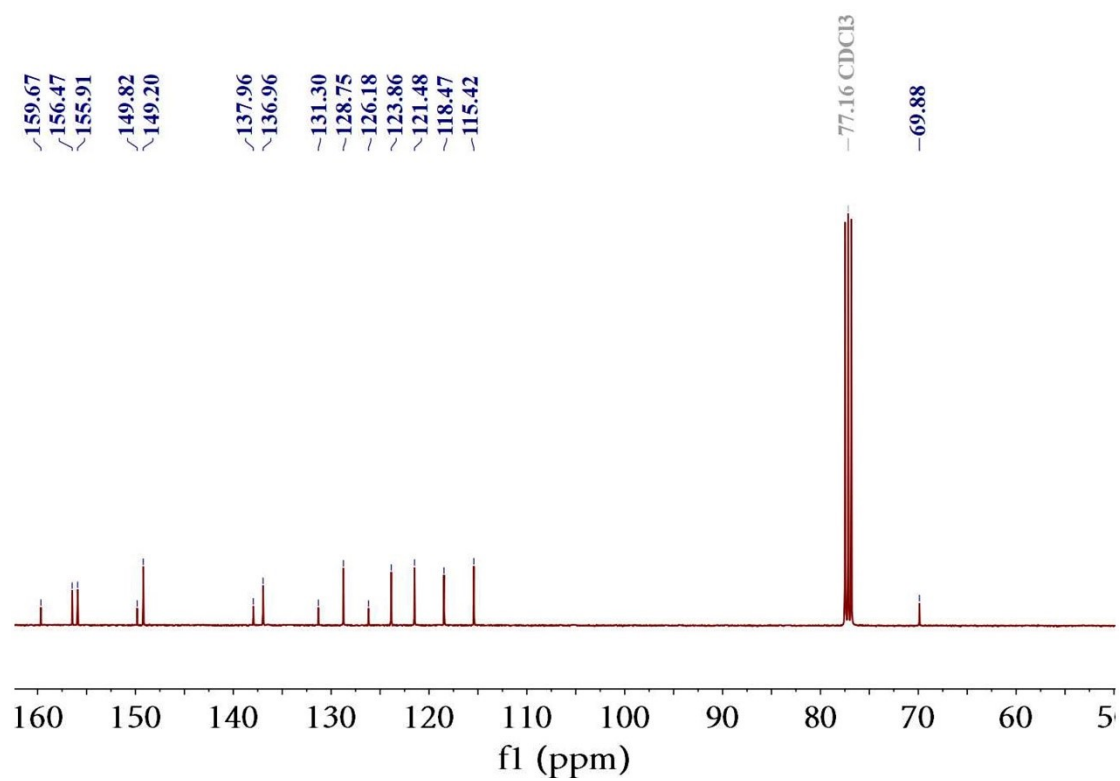

**Figure S2.**  $^{13}\text{C}$  NMR spectrum of **L** (100 MHz,  $\text{CDCl}_3$ )

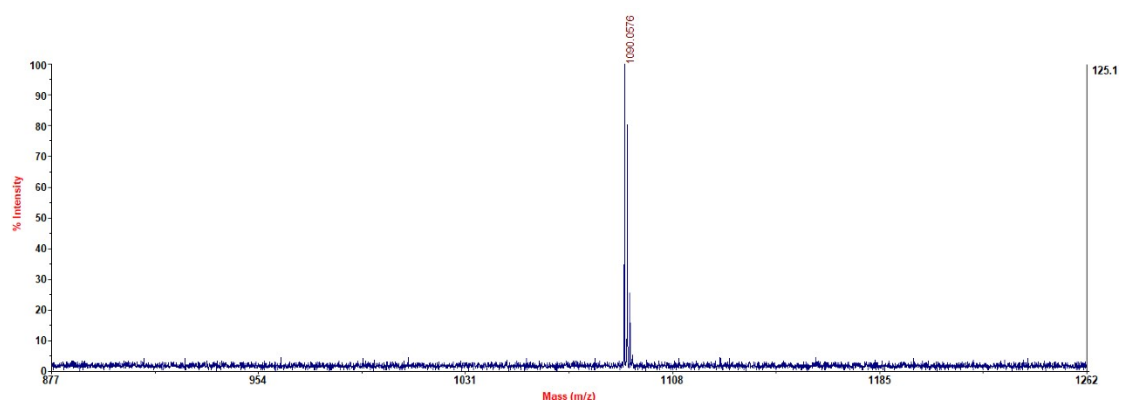

**Figure S3.** MALDI-TOF spectrum of **L**

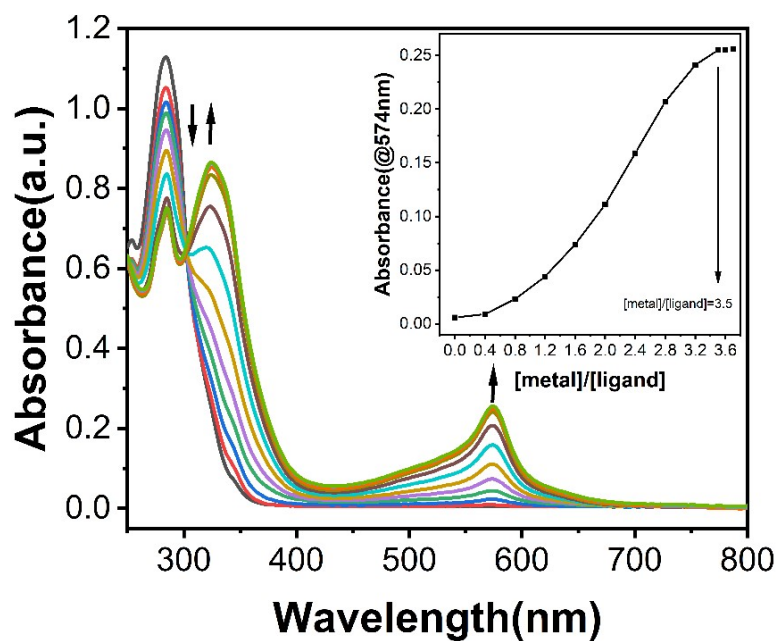

**Figure S4.** UV-vis absorption spectrum changes of the target ligand ( $10^{-5}$  M) in  $\text{CH}_3\text{CN}$  solution by continuous titration of  $\text{FeSO}_4$  aqueous solution ( $10^{-3}$  M). Inset: The absorbance value at  $\lambda_{\text{max, abs}} = 574$  nm changes with the concentration ratio of  $\text{Fe}^{2+}$  and ligand **L**.

**Table S1.** Images of the **L-Fe** film coated ITO glasses obtained by self-assembly of various concentrations of **L** in  $\text{CH}_2\text{Cl}_2$  solutions and absorbance values at  $\lambda_{\text{max, abs}} = 574$  nm.

| Ligand concentration | $10^{-3}\text{M}$                                                                   | $5 \times 10^{-4}\text{M}$                                                          | $10^{-4}\text{M}$                                                                   | $5 \times 10^{-5}\text{M}$                                                            | $10^{-5}\text{M}$                                                                     |
|----------------------|-------------------------------------------------------------------------------------|-------------------------------------------------------------------------------------|-------------------------------------------------------------------------------------|---------------------------------------------------------------------------------------|---------------------------------------------------------------------------------------|
| film                 |  |  |  |  |  |
| Abs@574nm            | 0.87                                                                                | 0.575                                                                               | 0.194                                                                               | 0.147                                                                                 | 0.054                                                                                 |

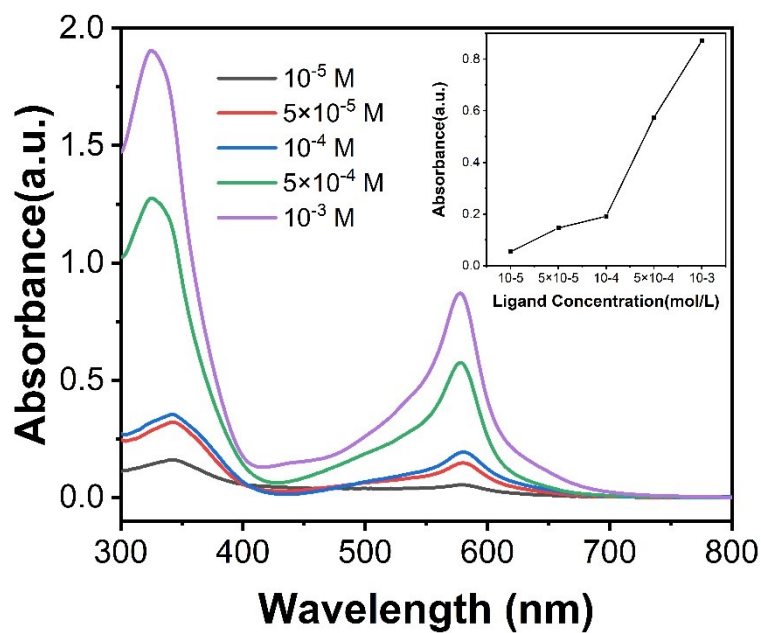

**Figure S5.** UV-vis absorption spectra of the **L-Fe** film coated ITO glasses obtained by self-assembly of various concentrations of **L** in  $\text{CH}_2\text{Cl}_2$  solutions. Inset: Absorbance value at  $\lambda_{\text{max, abs}} = 574 \text{ nm}$  changes with the concentration of **L** in  $\text{CH}_2\text{Cl}_2$  solution.

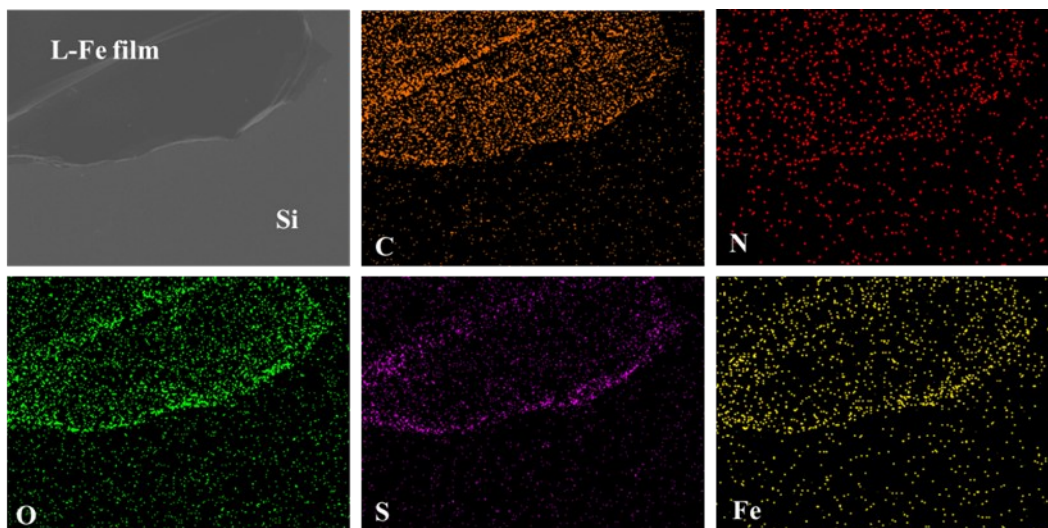

**Figure S6.** SEM and SEM/EDS element mapping images of the **L-Fe** film deposited Si substrate.

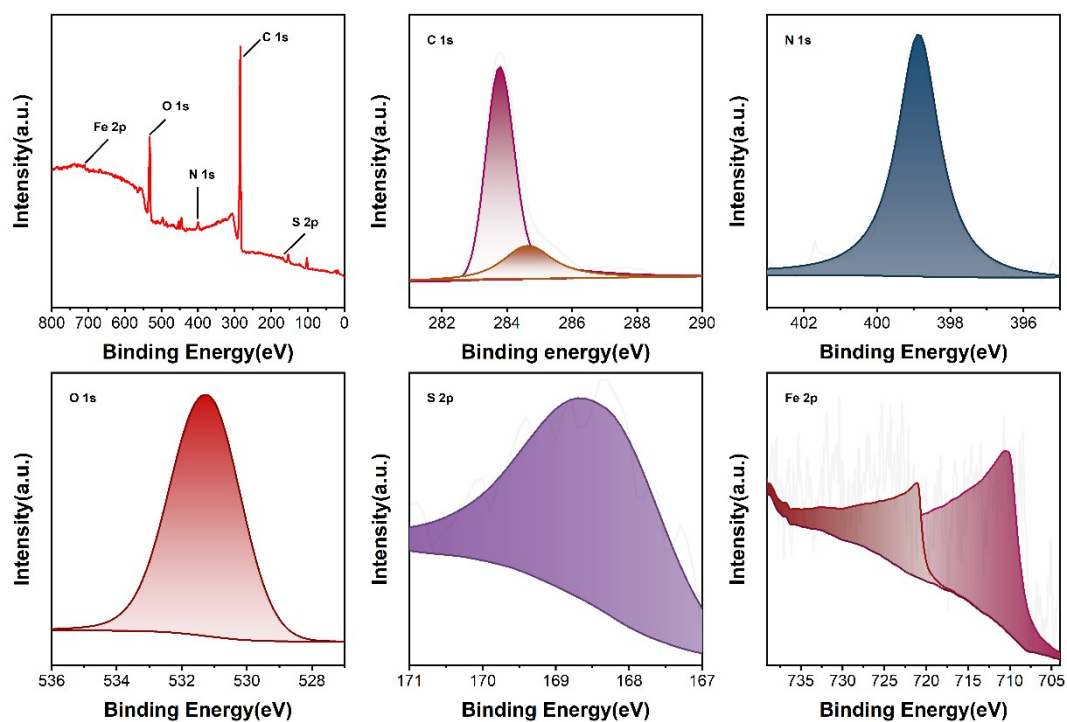

**Figure S7.** Full and fine XPS spectra of the **L-Fe** CONASHs film deposited Si substrate.

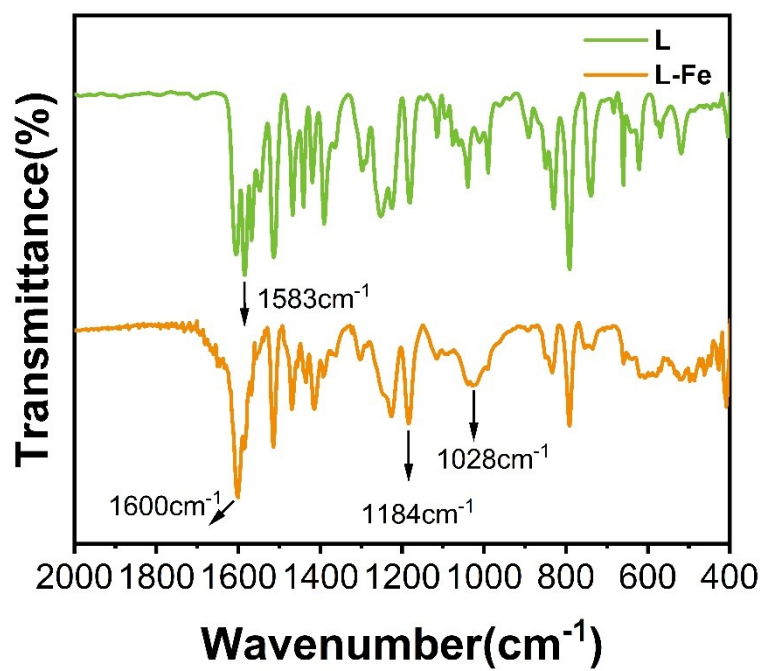

**Figure S8.** FT-IR spectra of **L** and **L-Fe** CONASHs film.

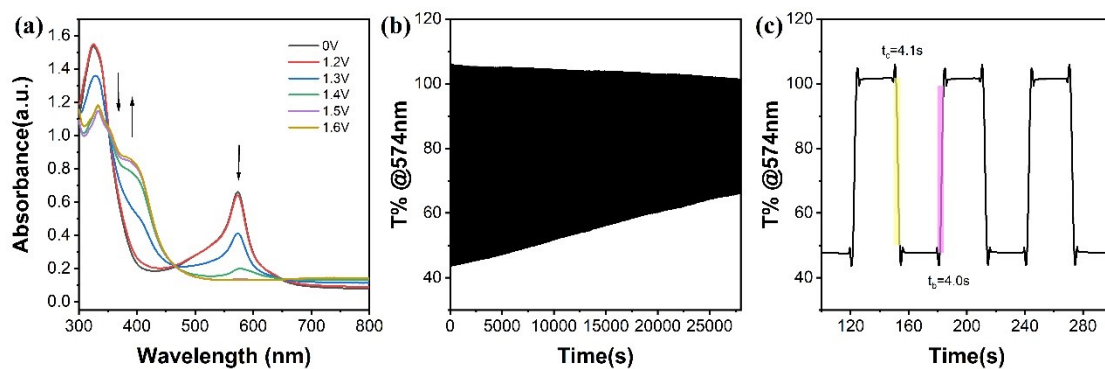

**Figure S9.** (a) Spectroelectrochemical properties of the **L-Fe** CONASHs film in 0.1 M  $n\text{Bu}_4\text{NClO}_4/\text{CH}_3\text{CN}$  electrolyte solution. (b) Transmittance change at  $\lambda_{\text{max, abs}} = 574$  nm upon applying the switch voltages between 0 and +1.5 V with a pulse width of 30 s. (c) Coloring and bleaching times of **L-Fe** CONASHs film.

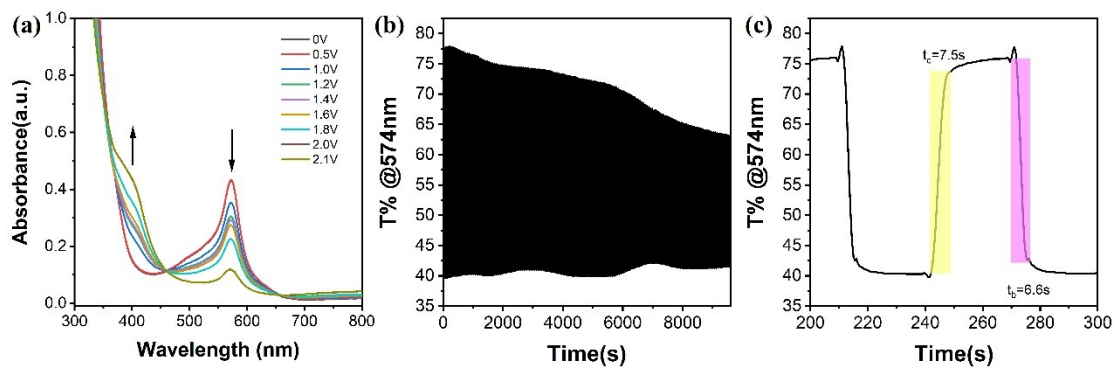

**Figure S10.** (a) Spectroelectrochemical behavior of the large-area **L-Fe** solid-state device ( $7 \times 7$   $\text{cm}^2$ ). (b) Long-term stability of the large-area device at  $\lambda_{\text{max, abs}} = 574$  nm upon applying the switching voltages between -0.8 and +2.1 V with a pulse width of 30 s. (c) Coloring and bleaching times of the large-area device.

**Table S2.** Electrochromic performance of the three-arm TPY based CONASHs devices reported previously and in this paper.

| Ligand Structure                                                                    | Metal ions | ECD type | EC performance        |                                    |                   |                                        |                   |                                        |                       | Reference |                     |
|-------------------------------------------------------------------------------------|------------|----------|-----------------------|------------------------------------|-------------------|----------------------------------------|-------------------|----------------------------------------|-----------------------|-----------|---------------------|
|                                                                                     |            |          | $\lambda_{\max}$ (nm) | Color Change                       | Coloration Step   |                                        | Bleaching Step    |                                        | $\Delta T_{\max}$ (%) |           | Long-term stability |
|                                                                                     |            |          |                       |                                    | Response time (s) | CE (C <sup>-1</sup> ·cm <sup>2</sup> ) | Response time (s) | CE (C <sup>-1</sup> ·cm <sup>2</sup> ) |                       |           |                     |
| 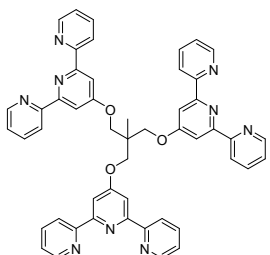   | Fe(II)     | Liquid   | 556                   | Intense pink/colorless             | 0.84              | -                                      | 0.88              | -                                      | -                     | -         | 34                  |
|                                                                                     |            | Solid    |                       |                                    | 1.15              | 470.16                                 | 2.49              | -                                      | 53                    | 1000      |                     |
|   | Fe(II)     | Liquid   | 580                   | purplish red /orange-yellow /green | 0.5               | 141.72                                 | 0.4               | -                                      | 22.3                  | 500       | 36                  |
|                                                                                     |            | Solid    |                       |                                    | 1                 | -                                      | 0.9               | -                                      | -                     | -         |                     |
|  | Fe(II)     | Liquid   | 570                   | Purple/yellow-green                | 14.3              | 172.82                                 | 7.3               | -                                      | 20                    | -         | 31                  |

|                                                                                   |        |        |     |                                    |      |       |     |       |      |      |              |
|-----------------------------------------------------------------------------------|--------|--------|-----|------------------------------------|------|-------|-----|-------|------|------|--------------|
| 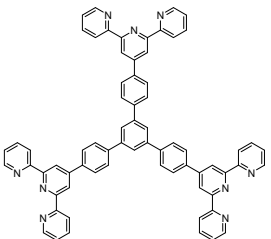 | Fe(II) | Liquid | 578 | deep<br>purple /<br>pale<br>yellow | -    | -     | -   | -     | -    | 800  | 30           |
|                                                                                   |        | Solid  | 579 |                                    | -    | -     | -   | -     | -    | -    |              |
|  | Fe(II) | Liquid | 588 | deep<br>violet/<br>pale<br>yellow  | 0.54 | -     | -   | -     | -    | 1000 |              |
|  | Fe(II) | Liquid | 574 | purple/pa<br>le yellow             | 4.1  | 581.0 | 4.0 | 233.7 | 53.9 | 500  | This<br>work |
|                                                                                   |        | Solid  | 574 |                                    | 3.9  | 875.2 | 3.7 | 182.3 | 56.3 | 500  |              |
